# Supplementary material for: Biochemical and transcriptomic analyses reveal the mechanisms underlying SNP and melatonin effects on antioxidant capacity and chlorophyll metabolism in postharvest okra
Source: Research Square preprint supplement (doi:10.21203/rs.3.rs-6832753/v1), 2025-06-27
Supplement: Supplementary file 1 [file 18294a69706cb7347489e0fb.docx]

| Comparison group | Up | Down | Total |
| --- | --- | --- | --- |
| Control vs FH | 3288 | 2937 | 6225 |
| SNP vs Control | 1187 | 1239 | 2426 |
| MT vs Control | 262 | 265 | 527 |
| SNP+MT vs Control | 125 | 131 | 256 |
| Postharvest senescence-specific DEGs | 2190 | 2175 | 4365 |
| SNP-specific DEGs | 451 | 313 | 754 |
| MT-specific DEGs | 75 | 65 | 140 |
| SNP+MT-specific DEGs | 31 | 13 | 44 |
