# Supplementary material for: Biochemical and transcriptomic analyses reveal the mechanisms underlying SNP and melatonin effects on antioxidant capacity and chlorophyll metabolism in postharvest okra
Source: Research Square preprint supplement (doi:10.21203/rs.3.rs-6832753/v1), 2025-06-27
Supplement: Supplementary file 2 [file 241c6233398f363bcc7318a6.xlsx]

## Sheet: Sheet1
Treatment	ReadSum	BaseSum	GC(%)	N(%)	Q20(%)	CycleQ20(%)	Q30(%)
FH_1	48440389	14532116700	44.43	0.01	98.53	100	96.06
FH_2	21922569	6576770700	45.18	0.01	98.78	100	96.61
FH_3	34650961	10395288300	44.37	0.01	98.64	100	96.16
Control_1	24667056	7400116800	44.38	0	98.65	100	96.17
Control_2	30731873	9219561900	44.52	0.01	98.63	100	96.17
Control_3	20940776	6282232800	44.64	0.02	98.85	100	96.57
MT_1	33437144	10031143200	44.41	0.02	98.55	100	96.22
MT_2	25033947	7510184100	44.17	0.01	98.65	100	96.19
MT_3	41627554	12488266200	44.29	0.01	98.68	100	96.23
SNP_1	22544717	6763415100	45.18	0.01	98.74	100	96.33
SNP_2	20026068	6007820400	44.57	0.03	98.59	100	96.1
SNP_3	21365260	6409578000	44.6	0.02	99.04	100	97
MT+SNP_1	21849739	6554921700	45.24	0.07	98.45	100	95.84
MT+SNP_2	39376361	11812908300	44.54	0.02	98.99	100	96.94
MT+SNP_3	22478584	6743575200	44.59	0.01	98.49	100	95.76
