# Supplementary material for: Biochemical and transcriptomic analyses reveal the mechanisms underlying SNP and melatonin effects on antioxidant capacity and chlorophyll metabolism in postharvest okra
Source: Research Square preprint supplement (doi:10.21203/rs.3.rs-6832753/v1), 2025-06-27
Supplement: Supplementary file 4 [file 618c5a538bf2c77ed0c03e30.docx]

| Annotation Database | Annotated Number | 300<=length<1000  bp | length>=1000  bp |
| --- | --- | --- | --- |
| COG | 6167 | 1316 | 4851 |
| GO | 15436 | 4416 | 11020 |
| KEGG | 13693 | 3709 | 9984 |
| KOG | 11563 | 3253 | 8310 |
| Pfam | 14877 | 3367 | 11510 |
| Swissprot | 14541 | 4095 | 10446 |
| TrEMBL | 18907 | 5414 | 13493 |
| eggNOG | 16540 | 4631 | 11909 |
| NR | 18954 | 5444 | 13510 |
| All | 19097 | 5522 | 13575 |
