# Supplementary material for: Biochemical and transcriptomic analyses reveal the mechanisms underlying SNP and melatonin effects on antioxidant capacity and chlorophyll metabolism in postharvest okra
Source: Research Square preprint supplement (doi:10.21203/rs.3.rs-6832753/v1), 2025-06-27
Supplement: Supplementary file 9 [file da906146ac66670c2cfd755e.docx]

| Gene Name | Primer sequence(5'-3') | Product size (bp) |
| --- | --- | --- |
| *Actin* | FP:TGGCATCACTCAGCACCT  RP:ACAATGGATGGACCCGAC | 73  73 |
| *PODP7* | FP:CGATTCGGGTTAGCGTTTT | 151 |
| RP:CGGTTAGCTCGGCCATTA | 151 |
| *POD42* | FP:GTCAAGAACGGCGGAGAT | 201 |
| RP: AAAGAAGCTGTAGAAAGGGAGT | 201 |
| *APX1* | FP:TGGGAAGGTGCCACAAGG | 167 |
| RP:CAATGGACGGAAAACAGG | 167 |
| *GST7* | FP:CTTTGCCACAATAGTCACCTC | 208 |
| RP:CGACACCCTTTATCTCATCC | 208 |
| *Frx2* | FP:CAGGCTCTGTTCGGGCTAA | 141 |
| RP:AGATTCCTCGGCTGCGTC | 141 |
| *LPOR* | FP:ACGACGGAATCTCCATAACA | 148 |
| RP:GCAAGAAAGCAAGGAAAAGG | 148 |
| *ClpP* | FP:GTGAATGAAGACGGGATGC | 176 |
| RP:TGGCTCTGAAACTACTCGGT | 176 |
| *ERF105* | FP:GACAATCTACTCTAACCCAACG | 195 |
| RP:CAAAGGTCCCAAGCCAAA | 195 |
| *SQE2* | FP:ATGTAGGGGACGGAGCAA | 142 |
| RP:TCCAAGAGCATAGGCAAGA | 142 |
| *PHI-1* | FP:AAACAAACAAATCGTTCAGC | 193 |
| RP:ACCGACCCAAATGTAGGC | 193 |
| *SRF7* | FP:TCGTGGAGTTGAGGAGTAGC | 185 |
| RP:GATGATGTGGGGTCTGGAT | 185 |
| *CIPK9* | FP:GGTCCTGCGGAGTTATTCT | 232 |
| RP:GGTGGCTTGTACCCTTTCT | 232 |
| *NAC102* | FP:CCGCCGAGGTTCAAAGCA | 220 |
| RP:TCAATCCCAACGCCCCAC | 220 |
| *Lhcb3* | FP:AGCCTTTACCTTCGTTAGTGT | 73 |
| RP:TCTTATTTCCTGCCCTGTTT | 73 |
| *PAO* | FP:ATGAGAATGGACAGGAAAGAG | 150 |
| RP:TGTGGGAAGGATCGGAGA | 150 |
| *MYB-like* | FP:CTGTTGGCTTGACCACTTC | 101 |
| RP:TGCTTACTTCCCACCATTCT | 101 |
