# Supplementary material for: Biochemical and transcriptomic analyses reveal the mechanisms underlying SNP and melatonin effects on antioxidant capacity and chlorophyll metabolism in postharvest okra
Source: Research Square preprint supplement (doi:10.21203/rs.3.rs-6832753/v1), 2025-06-27
Supplement: Supplementary file 10 [file f28b10b580e9c093296ceab3.xlsx]

## Sheet: Sheet1
Length Range	Transcript	Unigene
300-500	5893	4163
501-1000	4580	2147
1001-2000	31927	8402
2000+	17727	5399
Total Number	60127	20111
Total Length	104801304	31370312
N50 Length	1928	1948
Mean Length	1743	1559.86
